# Supplementary material for: Application of SEM-EDX for the Identification of Malignant Cells in Bronchial Brush Cytology: A Prospective Study
Source: Research Square preprint supplement (doi:10.21203/rs.3.rs-8234993/v1), 2025-12-22
Supplement: Supplementary file 1 [file 9552b601115d681a4bd3e37b.docx]

**Application of SEM-EDX for the Identification of Malignant Cells in Bronchial Brush Cytology: A Prospective Study**

Tatsuya Imabayashi1,2,*,†, Akiko Hisada3,*,†, Yuji Matsumoto1,4, Hideaki Furuse1, Yusuke Ominami5, Takaaki Tsuchida1

1 Department of Endoscopy, Respiratory Endoscopy Division, National Cancer Center Hospital, Tokyo, Japan

2 Department of Respiratory Medicine, Japanese Red Cross Kyoto Daiichi Hospital, Kyoto, Japan

3 Healthcare Innovation Center, Research & Development Group, Hitachi, Ltd., Tokyo, Japan

4 Department of Thoracic Oncology, National Cancer Center Hospital, Tokyo, Japan

5 Core Technology & Solutions Business Group, Hitachi High-Tech Corporation, Tokyo, Japan

Supplementary Table S1. Patient and lesion characteristics.

| Variables | Total (N=49) |
| --- | --- |
|
| Age, years | 68 (45–86) |
| Sex, female | 18 (36.7) |
| Past or current smoker | 39 (79.6) |
| Final diagnosis |  |
| Primary lung cancer | 47 (95.9) |
| Metastatic tumor (colon) | 1 (2.0) |
| Granuloma | 1 (2.0) |
| Clinical/pathological stage of primary lung cancer | (n=47) |
| Stage I | 20 (42.6) |
| Stage II | 5 (10.6) |
| Stage III | 10 (21.3) |
| Stage IV | 12 (25.5) |
| Tumor markers |  |
| CEA, ng/mL | 4.7 (1.1–13557.7) |
| CYFRA, ng/mL | 1.6 (0.4–16.4) |
| SCC, ng/mL | 1.1 (0.4–31.0) |
| Pro GRP, pg/mL | 51.85 (19.0–653.7) |
| Diameter of the lesion, mm | 51.2 (15.7–78.6) |
| Lesion appearance on CT |  |
| Solid | 46 (93.9) |
| Ground-glass opacity | 3 (6.1) |
| Lobar position | 1.5 (0–8) |
| Right upper lobe/left upper segment | 33 (67.3) |
| Right middle lobe/lingula | 4 (8.2) |
| Right lower lobe/left lower lobe | 12 (24.5) |
| Data are presented as n (%) or median (range).  Abbreviations: CEA, carcinoembryonic antigen; CYFRA, cytokeratin 19 fragment; SCC, squamous cell carcinoma antigen; Pro GRP, pro-gastrin releasing peptide; CT, computed tomography. | |
